# Supplementary material for: Exogenously Applied Gibberellic Acid Enhances Growth and Salinity Stress Tolerance of Maize through Modulating the Morpho-Physiological, Biochemical and Molecular Attributes
Source: MDPI journal article supplement (doi:10.3390/biom11071005), 2021-07-09
Supplement: s1 [file s1]

## Supplementary Information

### Exogenously Applied Gibberellic Acid Enhances Growth and Salinity Stress Tolerance of Maize Through Modulating the Morpho-Physiological, Biochemical and Molecular Attributes

Table S1: Two-way ANOVA analysis of salt stress, gibberellic acid (GA<sub>3</sub>) application, and their interaction for growth, physiological traits, antioxidant enzymes and ionic contents of maize

|                           | Source of variation |                             |                                              |
|---------------------------|---------------------|-----------------------------|----------------------------------------------|
|                           | Salt treatments     | GA <sub>3</sub> application | Salt treatment × GA <sub>3</sub> application |
| Shoot fresh weight        | 1099.98**           | 259.26**                    | 7.45**                                       |
| Shoot dry weight          | 1082.45**           | 277.15**                    | 6.82**                                       |
| Root fresh weight         | 935.63**            | 307.75**                    | 3.80**                                       |
| Root dry weight           | 210.01**            | 74.17**                     | 2.54*                                        |
| Shoot length              | 3175.82**           | 426.51**                    | 15.12**                                      |
| Root length               | 878.41**            | 169.23**                    | 5.94**                                       |
| Maximum leaf length       | 274.01**            | 44.53**                     | 7.29**                                       |
| Maximum leaf width        | 313.53**            | 52.75**                     | 2.58*                                        |
| Chlorophyll a             | 128.44**            | 191.93**                    | 9.73**                                       |
| Chlorophyll b             | 135.94**            | 345.77**                    | 4.50**                                       |
| Total chlorophyll content | 25.79**             | 205.68**                    | 5.03**                                       |
| Carotenoid content        | 47.19**             | 185.90**                    | 3.03**                                       |
| Hydrogen peroxide content | 604.23**            | 71.38**                     | 15.23**                                      |
| Superoxide dismutase      | 79.51**             | 60.32**                     | 99.37**                                      |
| Peroxidase                | 17.24**             | 9.68**                      | 50.07**                                      |
| Catalase                  | 9.31**              | 24.29**                     | 83.49**                                      |
| Total soluble protein     | 151.51**            | 27.00**                     | 0.84ns                                       |
| Total phenolic content    | 161.38**            | 145.40**                    | 2.84*                                        |
| Root Na <sup>+</sup>      | 354.98**            | 44.58**                     | 5.48**                                       |
| Leaf Na <sup>+</sup>      | 279.67**            | 94.31**                     | 1.00ns                                       |
| Leaf K <sup>+</sup>       | 99.15**             | 36.62**                     | 0.90ns                                       |
| Root K <sup>+</sup>       | 51.78**             | 62.06**                     | 1.78ns                                       |
| Shoot Ca <sup>2+</sup>    | 2.68ns              | 3.79**                      | 0.13ns                                       |
| Root Ca <sup>2+</sup>     | 40.57**             | 30.81**                     | 2.73**                                       |

Data represent F-values. Significant effects are donated as: \* - significant at P≤0.05, \*\* - significant at P≤0.01, \*\*\* - significant at P≤0.001, ns – non-significant.
